# Supplementary material for: Upfront dose-reduced chemotherapy synergizes with immunotherapy to optimize chemoimmunotherapy in squamous cell lung carcinoma
Source: HighWire-hosted journal article supplement (doi:10.1136/jitc-2020-000807), 2020-10-01
Supplement: jitc-2020-000807supp002_data_supplement.xls [file jitc-2020-000807supp002_data_supplement.xls]

## Sheet: RNA seq
gene_name	KLN_CON	KLN_DDP	KLN_GEM	KLN_DTX	KLN_PTX
Perp	221.047	623.496	273.363	368.233	330.793
Hsp90aa1	179.559	491.718	304.844	270.284	184.66
Ccng1	126.251	364.484	335.341	221.444	151.182
Igfbp3	172.032	205.64	196.353	241.206	221.533
Pdia3	165.973	275.698	173.685	239.466	169.956
Rrm2b	1.16126	1.85889	3.41324	1.70003	1.27489
Ddit3	61.9536	106.616	129.377	63.6234	62.5101
Calm1	63.11	108.917	79.7289	73.1265	71.5797
Lamc2	53.1586	100.834	60.3492	74.4235	59.364
Marcksl1	26.0108	89.1955	56.4072	52.9854	55.8004
Pmaip1	19.2931	45.8303	54.0224	41.5366	35.1474
Irak1	31.1393	45.0862	36.1937	36.8755	35.714
Lama3	22.7838	30.2561	37.873	48.7207	38.7193
Plcb3	26.6934	36.9496	33.3645	32.4144	31.3606
Otud5	26.9538	29.967	30.4785	34.7363	36.4513
Csf2ra	2.02468	2.70358	3.63997	2.35461	2.51917
Mapk10	0.631941	0.92151	1.44738	1.18219	0.970167
B2m	18.7314	51.0114	30.1425	27.1682	21.4187
Nras	25.3338	27.2097	33.2319	27.177	25.4082
Casp3	23.8073	24.8526	26.2572	32.6961	28.5075
Shisa5	23.7932	30.6377	26.4848	25.735	28.4804
Atg12	21.0545	31.2311	27.966	26.8853	24.2141
Ifi30	17.693	40.1509	27.6197	19.6258	23.6329
Hdac2	22.7699	27.6057	25.1075	29.1715	22.9282
Homer3	16.324	23.5264	23.6167	19.9402	26.0963
Marcksl1.1	26.0108	89.1955	56.4072	52.9854	55.8004
Creb3l3	0.62063	1.54316	0.820629	1.33125	1.28116
Rala	16.3572	20.9599	23.3358	17.0703	18.6966
Atp6v1c1	14.1172	15.4188	16.691	19.7866	17.7382
Ppp1cb	12.6718	17.6278	19.4845	19.2867	13.8088
Dgka	11.1609	15.4929	17.9448	17.5435	18.1069
Scrib	13.6002	17.072	16.3268	14.2153	17.3675
Tln1	12.437	14.9143	12.6884	15.9125	14.6032
Map3k7	11.1448	15.6462	16.8399	14.3096	12.1965
Dtx3l	1.37718	2.37865	1.64584	2.38279	1.73818
Impa1	10.8081	17.6593	11.7239	11.3528	12.4515
Fos	8.60956	9.45432	17.0399	16.536	12.2876
Dnm1l	9.04846	10.3532	12.2344	12.5235	9.1864
Nfyb	8.65153	8.97936	15.1649	10.3945	10.1204
Cul3	7.77554	8.73733	14.9698	11.9322	8.82005
Pias3	7.68742	11.263	9.61964	10.6428	11.3752
Txnip	4.23189	12.1155	18.5337	5.65371	7.42359
Brap	7.37741	9.39789	7.84463	8.69918	9.37408
Lamb2	7.25577	9.36706	7.58196	8.70129	8.17205
Tyk2	6.99005	7.75883	7.93792	7.5961	8.46591
Blnk	5.93634	8.30089	7.27676	8.84961	8.24316
Itga2b	0.624003	2.8445	2.15753	1.2506	1.66926
Csf1r	0.0348343	0.158791	0.106665	0.0495129	0.0758482
Mapk9	5.39292	5.90766	8.25672	7.92211	5.85957
Id2	4.90907	8.44914	5.34307	6.76602	5.25404
Tnfrsf18	1.93539	4.41121	7.03745	6.28482	9.89855
Ifi204	4.36444	5.92983	6.66989	7.11823	5.32136
Icam1	4.3322	6.56296	6.9514	4.8485	6.50714
Ripk1	5.06445	5.24732	5.76072	6.44099	5.53164
Gnai1	3.78146	4.67369	8.79508	4.56738	5.21714
Sike1	3.91698	4.03484	5.26741	4.54799	4.4572
Scin	2.66682	3.04633	4.54629	5.67778	4.74775
Irf7	2.53866	7.44104	3.43829	3.15149	2.85963
Dgkq	2.83254	2.96126	4.34274	3.55959	4.04954
Mapk8ip3	2.43517	4.05543	3.36144	3.11351	2.99597
Ntf5	2.60839	2.98881	2.91331	3.1909	3.63116
Hspa2	2.23112	4.04211	2.67688	2.63459	2.88279
Mtmr1	1.97495	2.73614	3.74258	2.86496	1.99655
Csf2ra.1	2.02468	2.70358	3.63997	2.35461	2.51917
Ifi207	1.21002	1.76306	3.52751	2.24766	3.74323
Map4k2	1.98859	2.81415	2.26711	2.31462	2.40524
Sirt1	1.45768	2.92629	3.11142	2.04167	1.76735
Inpp5f	1.67651	1.85362	2.83285	2.73169	1.7171
Mapk8ip3.1	2.43517	4.05543	3.36144	3.11351	2.99597
Casp12	0.0147713	0.179559	0.0452306	0.151169	0.082705
Rprm	0.427356	3.06972	2.52796	1.78918	2.5378
Il1f9	0.929302	2.66723	1.08026	3.78656	1.76651
Col9a3	1.26605	2.28165	1.78058	1.93346	2.48652
Rap1gap	1.22637	2.45333	1.91138	2.22721	1.8607
Dtx3l.1	1.37718	2.37865	1.64584	2.38279	1.73818
Tnfsf13b	0	0.0376478	0.0632227	0.0422604	0.0154139
Rrm2b.1	1.16126	1.85889	3.41324	1.70003	1.27489
H2-DMa	1.0024	2.78366	1.58762	1.41496	2.03209
Itga2b.1	0.624003	2.8445	2.15753	1.2506	1.66926
Acvrl1	0.758064	1.31354	1.30315	2.27976	2.68069
Irf9	1.15845	2.43235	1.80586	1.34722	1.42499
Gm2446	0.661265	3.46093	2.24981	0.814589	0.959892
Steap3	0.942883	1.1914	1.11688	2.10764	2.22283
Itgb6	0.87743	1.51505	1.16018	1.65986	1.60781
Asap3	0.71154	1.77476	1.16133	1.39684	1.55348
Ddx58	0.804565	0.831319	2.16799	1.31056	1.00607
Il18	0.550163	1.67194	1.05289	1.45451	1.28349
Gbp2	0.473433	2.36367	0.983712	1.21127	0.820475
Creb3l3.1	0.62063	1.54316	0.820629	1.33125	1.28116
Tnfrsf9	0.604311	1.13989	1.21235	1.11961	1.18619
Oas3	0.802403	1.24363	1.13636	1.10859	0.965925
Cop1	0.712423	0.870936	1.47002	1.1682	1.02139
Mapk10.1	0.631941	0.92151	1.44738	1.18219	0.970167
S1pr4	0.261501	2.45633	0.673341	0.628498	0.576786
Deptor	0.632799	0.844983	0.758431	1.00847	0.727699
Nod1	0.446717	0.967263	0.803625	0.742898	0.719089
Il22ra1	0.33119	0.50324	0.709886	1.03565	0.968379
Il19	0.148099	0.900139	0.264534	0.926223	1.19775
Ccr1	0.420458	0.608459	0.61308	1.05866	0.485779
Serpinf1	0.240449	0.365359	0.2761	0.553667	1.21165
Syngap1	0.229146	0.261139	1.07128	0.495536	0.580403
Il1f8	0.326255	0.708203	0.35679	0.635978	0.565411
Gbp3	0.121609	0.976712	0.452167	0.385215	0.648468
Ccl27a	0.119314	1.08778	0.274009	0.142456	0.378557
Grb10	0.187221	0.379308	0.410852	0.574805	0.687191
Prickle3	0.266137	0.632962	0.29231	0.414466	0.572287
Il1r2	0.327013	0.406548	0.432393	0.380299	0.499351
Ccl27a.1	0.119314	1.08778	0.274009	0.142456	0.378557
Fgfr3	0.253576	0.28898	0.576283	0.27708	0.377129
Rragd	0.142545	0.199934	0.738659	0.37405	0.245573
Cxcr2	0.130267	0.28277	0.256425	0.555477	0.468879
Id4	0.235788	0.268709	0.349717	0.339335	0.453814
Itga10	0.109375	0.581679	0.360031	0.167901	0.306197
Egr2	0.150234	0.177551	0.34502	0.412845	0.373852
Adcy7	0.168489	0.256017	0.393391	0.323308	0.314458
Fgf17	0.0335831	0.102058	0.102833	0.114563	0.0626775
Gli1	0.0908458	0.690196	0.130395	0.125899	0.20134
Il11	0.0845753	0.171348	0.431624	0.144257	0.263077
Egf	0.115708	0.168172	0.388963	0.257423	0.145531
Pik3cd	0.0543747	0.344257	0.291372	0.193218	0.160679
Inpp4b	0.112871	0.191295	0.325677	0.255458	0.141787
Il7	0.0801156	0.106518	0.321981	0.341625	0.140178
Nfatc4	0.107428	0.281952	0.276617	0.141591	0.154929
Ptpn7	0.0278868	0.197744	0.142318	0.110986	0.451069
Adcy8	0.0556642	0.15859	0.154468	0.338239	0.220763
Naip1	0.071722	0.171256	0.133339	0.288357	0.248593
Pla2g4e	0.0814969	0.11145	0.112297	0.298863	0.288992
Flt3l	0.102386	0.111125	0.324709	0.162162	0.177438
Lat	0.0819976	0.21804	0.219696	0.0874125	0.229553
Cyct	0	0.394755	0.0662922	0.147707	0.080811
Aph1c	0.0217951	0.165587	0.166845	0.167288	0.14237
Adcy4	0.0242816	0.295165	0.111527	0.0931864	0.101965
Mmp9	0.0641106	0.146123	0.184041	0.109351	0.0897392
Fgf7	0.0523909	0.0530716	0.187161	0.148935	0.146669
Arap3	0.0217159	0.0824926	0.0914309	0.166679	0.192514
Mtmr7	0.0509401	0.0580523	0.204726	0.141191	0.0713038
Notch4	0.0562926	0.171072	0.107732	0.066011	0.105061
Flt4	0.0137808	0.0837592	0.168791	0.12928	0.109309
Cacng1	0	0.207017	0.0695298	0.0387302	0.169515
Casp12.1	0.0147713	0.179559	0.0452306	0.151169	0.082705
Mapt	0.0150636	0.137334	0.21333	0.0513866	0.0421706
Fhl1	0.0152724	0.232063	0.0350738	0.117223	0.0570072
Shc4	0.0480519	0.0730144	0.131373	0.0702516	0.128116
Csf1r.1	0.0348343	0.158791	0.106665	0.0495129	0.0758482
Fgf17.1	0.0335831	0.102058	0.102833	0.114563	0.0626775
Trpv2	0.037941	0.134519	0.0484073	0.0647145	0.118018
Gng4	0	0.0516097	0.182006	0.130349	0.0316953
Gfap	0	0.204334	0.0514715	0.0344055	0.0752933
Trp73	0	0.0467229	0.0627703	0.148601	0.105212
Flt1	0.0252022	0.0893539	0.0771707	0.0788085	0.082313
Cacna1i	0.0172547	0.0873943	0.0924608	0.0686714	0.0483047
Pak3	0.00593822	0.00902306	0.113645	0.126607	0.0554137
Nlrp12	0.0225534	0.102809	0.0230199	0.102583	0.0491078
Ihh	0	0.028277	0.0712293	0.0952246	0.104195
Cxcr6	0	0.044634	0.112432	0.0751539	0.0548226
Pik3r5	0.0204403	0.0776471	0.117355	0.0348642	0.0286115
Agap2	0	0.0435221	0.0365438	0.154706	0.0356379
Itga11	0.0221095	0.0503927	0.0930881	0.047139	0.0515798
Il23r	0.0227982	0.103925	0.0349046	0.0388859	0.0425492
Vcam1	0.0191844	0.0291505	0.0734296	0.0436294	0.053707
Vav1	0	0.0701098	0.0353211	0.0655831	0.0430568
Vwf	0.00353099	0.0268265	0.0297333	0.0662494	0.0593103
Pfn4	0.023733	0.036062	0.0363359	0.0404804	0.0442939
Cacna1c	0.00267669	0.00813442	0.104501	0.0296759	0.0299738
Tgfb2	0.00979483	0.0148831	0.0674827	0.0501199	0.0182805
Tnfsf13b.1	0	0.0376478	0.0632227	0.0422604	0.0154139
Pla2g2f	0	0.0349648	0.0176152	0.0784975	0.0214731
Nlrc4	0.0119945	0.0182255	0.0459097	0.040917	0.0335787
Ptprc	0.00929206	0.023532	0.035566	0.0369812	0.0202325
Btk	0	0.02737	0.0137889	0.0153617	0.0672356
Ccr4	0	0.0557312	0.0140386	0.0156399	0.0342264
Ntrk1	0	0.033303	0.016778	0.0373834	0.0204525
Tnxb	0.0046459	0.0564752	0.00711301	0.0158487	0.0216771
Rasgrp4	0	0.0270904	0.00682404	0.0304096	0.0166372
Flt3l.1	0.102386	0.111125	0.324709	0.162162	0.177438
Dlg2	0	0.0158824	0.00266716	0.00594276	0.0130052
Ntrk2	0	0.00893513	0.00900298	0.00250747	0.00823106
Il22ra1.1	0.33119	0.50324	0.709886	1.03565	0.968379
