# Supplementary material for: Upfront dose-reduced chemotherapy synergizes with immunotherapy to optimize chemoimmunotherapy in squamous cell lung carcinoma
Source: PubMed Central journal article supplement — J Immunother Cancer. 2020 Oct 28;8(2):e000807. doi: 10.1136/jitc-2020-000807 (PMC7594539; doi:10.1136/jitc-2020-000807), 2020-10-28
Supplement: jitc-2020-000807supp003.pdf [file jitc-2020-000807supp003.pdf]

| Chemotherapeutic agents | CDDP (mg/kg) |     | GEM (mg/kg) |     | PTX (mg/kg) |     | DTX (mg/kg) |     |
|-------------------------|--------------|-----|-------------|-----|-------------|-----|-------------|-----|
|                         | High         | Low | High        | Low | High        | Low | High        | Low |
| Dosage                  | 8.4          | 2.8 | 240         | 80  | 33          | 11  | 33          | 11  |

**Supplementary Table S2:** High and low dosages of different chemotherapeutic agents utilized in the above experiment. The high dose is three times as high as the low dose.
