# Supplementary material for: Upfront dose-reduced chemotherapy synergizes with immunotherapy to optimize chemoimmunotherapy in squamous cell lung carcinoma
Source: PubMed Central journal article supplement — J Immunother Cancer. 2020 Oct 28;8(2):e000807. doi: 10.1136/jitc-2020-000807 (PMC7594539; doi:10.1136/jitc-2020-000807), 2020-10-28
Supplement: jitc-2020-000807supp004.pdf [file jitc-2020-000807supp004.pdf]

## Personal cover

### Wang Jie

#### Position of Hospital

Professor and Director, Department of Medical Oncology, National Cancer Center/National Clinical Research Center for Cancer/Cancer Hospital, Chinese Academy of Medical Sciences & Peking Union Medical College

#### Position of Committee

- Member of American Society of Clinical Oncology (ASCO)
- executive committee of Chinese Society of Clinical Oncology (CSCO)
- standing Committee of the CACA Lung Cancer Profession Committee
- vice president of the Beijing Cancer Committee
- Core Member of Guidelines for Lung Cancer of National Health and Family Planning Commission of the People's Republic of China and Chinese Society of Clinical Oncology Professional Committee, Responsible for Molecular Subtype of Lung Cancer

#### Publication

- 1) Wang Z, Cheng Y, **Wang J\***, et al. Detection of EGFR mutations in plasma circulating tumour DNA as a selection criterion for first-line gefitinib treatment in patients with advanced lung adenocarcinoma (BENEFIT): a phase 2, single-arm, multicentre clinical trial. *Lancet Respir Med*. 2018 Sep; 6(9):681-690.
- 2) Tian Y, Wang Z, Liu X, **Wang J\***, et al. Prediction of Chemotherapeutic Efficacy in Non-Small Cell Lung Cancer by Serum Metabolomic Profiling. *Clin Cancer Res*. 2018 May 1;24(9):2100-2109.
- 3) **Wang J**, Wang Z, Zhao J, Mok TSK\*. Co-mutations in DNA damage response pathways serve as potential biomarkers for immune checkpoint blockade. *Cancer Res*. 2018 Aug 31. pii: canres.1814.2018.
- 4) Duan J, Yang X, **Wang J\***, et al. Correlation among genetic variations of c-MET in Chinese patients with non-small cell lung cancer. *Oncotarget*. 2017 Dec 20;9(2):2660-2667.
- 5) Zhong J, Li L, **Wang J\***, et al. Potential Resistance Mechanisms Revealed by Targeted Sequencing from Lung Adenocarcinoma Patients with Primary Resistance to Epidermal Growth Factor Receptor (EGFR) Tyrosine Kinase Inhibitors (TKIs). *J Thorac Oncol*. 2017 Dec;12(12):1766-1778.
- 6) Mok TSK1, **Wang J**, Soria JC\*. Gefitinib Plus Chemotherapy Versus Chemotherapy in Epidermal Growth Factor Receptor Mutation-Positive Non-Small-Cell Lung Cancer Resistant to First-Line Gefitinib (IMPRESS): Overall Survival and Biomarker Analyses. *J Clin Oncol*. 2017 Dec 20;35(36):4027-4034.
- 7) Xiaohui Ni, Minglei Zhuo, Zhe Su, Jianchun Duan, Yan Gao, Zhijie Wang, Chenghang Zong, Hua Bai, Alec R. Chapman, Jun Zhao, Liya Xu, Tongtong An, Qi Ma, Yuyan Wang, Meina Wu, Yu Sun, Shuhang Wang, Zhenxiang Li, Xiaodan Yang, Jun Yong, Xiao-Dong Su, Youyong Lu, Fan Bai, X. Sunney Xie and **Jie Wang\***. Reproducible copy number

- variation patterns among single circulating tumor cells of lung cancer patients. PNAS 2013,110(52):21083-21088.
- 8) Zhigang Wei, Tongtong An , Zhijie Wang, Hua Bai, Jianchun Duan, Meina Wu, Lu Yang, Minglei Zhuo, Yuyan Wang, Xuyi Liu, **Jie Wang\***. Patients Harboring EGFR Double Mutations Had A Lower Objective Response Rate than Those with Single Mutation in Non-Small Cell Lung Cancer When Treated with EGFR-TKIs. Thoracic cancer 2013, (corresponding author).
  - 9) Shuhang Wang, Tongtong An, Jianchun Duan, Lijian Zhang, Meina Wu, Qinghua Zhou, Jinfeng Chen, Minglei Zhuo, Lu Yang, Yuyan Wang, Hua Bai, **Jie Wang\***. Alterations in EGFR and related genes following neo-adjuvant chemotherapy in Chinese patients with non-small cell lung cancer. Plos One 2013,8(3):1-8.
  - 10) Hua Bai, Zhijie Wang, Yuyan Wang, Minglei Zhuo, Qinghua Zhou, Jianchun Duan, Lu Yang, Meina Wu, Tongtong An, Jun Zhao, **Jie Wang\***. Detection and Clinical Significance of Intratumoral EGFR Mutational Heterogeneity in Chinese Patients with Non-small Cell Lung Cancer. Plos One 2013,8(2):1-7.
  - 11) Hua Bai, Zhijie Wang, Keneng Chen, Jun Zhao, J. Jack Lee, Shuhang Wang, Qinghua Zhou, Minglei Zhuo, Li Mao, Tongtong An, Jianchun Duan, Lu Yang, Meina Wu, Zhen Liang, Yuyan Wang, Xiaozheng Kang, **Jie Wang\***. Influence of Chemotherapy on EGFR Mutation Status Among Patients With Non-Small-Cell Lung Cancer. J Clin Oncol, 2012,30:3077-3083.
  - 12) Fen Wang, Shuhang Wang, Zhijie Wang, Jianchun Duan, Tongtong An, Jun Zhao, Hua Bai, **Jie Wang\***. Phosphorylated EGFR expression may predicts outcome of EGFR-TKIs therapy for the advanced NSCLC patients with wild-type EGFR. Journal of Experimental & Clinical Cancer Research 2012, 31:65 (corresponding author).
  - 13) Zhijie Wang, Xuchao Zhang, Hua Bai, Jun Zhao, Minglei Zhuo, Tongtong An, Jianchun Duan, Lu Yang, Meina Wu, Shuhang Wang, Yuyan Wang, Yilong Wu, **Jie Wang\***. EML4-ALK Rearrangement and Its Clinical Significance in Chinese Patients with Advanced Non-Small Cell Lung Cancer. Oncology 2012;83:248–256(corresponding author).
  - 14) Jian Zhu,Jianchun Duan, Hua Bai ,Zhijie Wang,Lai Wei,Jun Zhao,Minglei Zhuo,Shuhang Wang,Lu Yang, Tongtong An,Meina Wu,Yuyan Wang, **Jie Wang\***. DNA Methylation status of Wnt antagonist SFRP5 can predict the response to the EGFR-tyrosine kinase inhibitor therapy in non-small cell lung cancer. Journal of Experimental & Clinical Cancer Research 2012, 31:80 doi:10.1186/1756-9966-31-80 (corresponding author).
  - 15) Zhen Huang, Zhijie Wang,Hua Bai, Meina Wu,Tongtong An, Jun Zhao, Lu Yang,Jianchun Duan,Minglei Zhuo, Yuyan Wang, Shuhang Wang, **Jie Wang\***. The detection of EGFR mutation status in plasma is reproducible and can predict the efficacy of EGFR-TKIs dynamically. Thoracic cancer 2012,4:334-340. (corresponding author).
  - 16) Hua Bai, Li Mao, Shuhang Wang, Jun Zhao, Lu Yang, Tongtong An, Xin Wang, Jianchun Duan Meina Wu, Qingzhi Guo, Xuyi Liu, Ninghong Liu, Yuye Wang, **Jie Wang\***. EGFR Mutations in Plasma DNA Samples Predict Tumor Response in Chinese Patients with Stage IIIB/IV Non-Small-Cell Lung Cancer. J Clin Oncol , 2009,( 27 ): 2653-2659 (corresponding author).
  - 17) Shuhang wang , Tongtong An, **Jie Wang\***, Jun Zhao, Zhijie Wang, Minglei Zhuo, Hua Bai, Lu Yang, Yan Zhang, Xin Wang, Jianchun Duan, Yuyan Wang, Qingzhi Guo, Meina Wu.

- Potential clinical significance of a plasma-based KRAS mutation analysis in patients with advanced NSCLC. *Clin Cancer Res* 2010, 15,16(4):1324-1330 (corresponding author).
- 18) Mei na Wu, Jun Zhao, Sonya Wei Song, Hua Bai, Minglei Zhuo ,Shuhang Wang, Lu Yang, Tongtong An, Xin Wang, Jianchun Duan, Yuyan Wang, Qingzhi Guo, Xuyi Liu, Ninghong Liu, **Jie Wang\***. Plasma EGFR mutations are not associated with response to first-line chemotherapy but with prognosis in the Chinese patients with advanced non-small cell lung cancer. *lung cancer* 2010, 67(3):343-347 (corresponding author).
  - 19) Xin Wang , Jun Zhao , Lu Yang, Li Mao. **Jie Wang\***, et al. Positive expression of ERCC1 predicts a poorer platinum-based treatment outcome in Chinese patients with advanced non-small-cell lung cancer. *Med Oncol* 2010,27(2):484-490 (corresponding author).
  - 20) **Jie Wang**. Manisha Bhutani1, Ashutosh K. DNMT3B Variants Regulate DNA Methylation in a Promoter-Specific Manner. *Cancer Res* 2007,67: 10647-10652 (first author).
  - 21) **Jie Wang**, Walsh G, Liu D, et al. Expression of deltaDNMT3B variants and its association with promoter methylation of P16 and RASSF1A in Primary non-small cell lung cancer. *Cancer Res* , 2006; 66 ( 17 ) :8361-8366 (first author)
  - 22) **Jie Wang**, J.Jack Lee, Luo Wang, Diane D.Liu, Charles Lu, Waun Ki Hong, and Li Mao. Value of p16 INK4a and RASSF1A promoter hypermethylation in prognosis of patients with resectable Non-Small Cell Lung Cancer. *Clin Cancer Res*.2004,10: 6119-6126. (first author).
  - 23) Wang L, **Jie Wang**, Marivonne R, et al. A novel DNMT3B subfamily, is the predominant form of DNMT3B in Non-small cell lung cancer. *Int. J.Oncol.*, 2006:29(1): 201-207.
